# Supplementary material for: Malaria and Fetal Growth Alterations in the 3rd Trimester of Pregnancy: A Longitudinal Ultrasound Study
Source: PubMed Central journal article supplement (PMC3543265; doi:10.1371/journal.pone.0053794), 2013-01-11
Supplement: pone.0053794.s004.pdf [file pone.0053794.s004.pdf]

**Supplementary Table S4.** Characteristics of all malaria positive women.

Persistent anemia was defined as a Hb<8 g/dl at two or more ANVs. TZKH0644 suffered from asthma, none of the other women had chronic conditions. Women were only considered exposed to malaria in the period following the diagnosis. In this table fetal weight gains shown in *italic* are the weight gains that occurred before the malaria diagnoses. During this period it is uncertain whether the women were exposed to malaria and they were therefore excluded from the analyses presented in Table 3. Empty cells indicate that data to generate weight gains were not available. Cells with “/” represent information on each infection in women who had several infections.

| ID number | Fetal growth pattern | ANV2-ANV3 (g/week*kg) | ANV3-ANV4 (g/week*kg) | ANV4-Delivery (g/week*kg) | ANV3-Delivery (g/week*kg) | Z-score at delivery | GA at inclusion (days) | GA at Delivery (days) | Gravidity | Number of infections | Timing of infection | GA at infection (Days) | Slide/PCR positive | RDT positive | Parasitemia at infection (IE/ul) | Febrile infection | Treatment | IPTp before inclusion | IPTp before 1st infection | GA (days) at 1st IPTp dose | GA (days) at 2nd IPTp dose | Sex of fetus/newborn | Ever severe anemia (Hb<8g/dl) | Persistent anemia (Hb<8g/dl) | MUAC<23cm at inclusion | Pregnancy-induced hypertension | Maternal HIV infection | Stillborn | Maternal diabetes |   |
|-----------|----------------------|-----------------------|-----------------------|---------------------------|---------------------------|---------------------|------------------------|-----------------------|-----------|----------------------|---------------------|------------------------|--------------------|--------------|----------------------------------|-------------------|-----------|-----------------------|---------------------------|----------------------------|----------------------------|----------------------|-------------------------------|------------------------------|------------------------|--------------------------------|------------------------|-----------|-------------------|---|
| TZKH0013  |                      | 152                   | 196                   |                           |                           |                     | 158                    | 267                   | PS        | 1                    | A2                  | 174                    | N                  | Y            | 0                                | N                 | Y         | N                     | N                         | 174                        | 200                        | M                    | Y                             | Y                            | N                      | N                              | N                      | N         | N                 | N |
| TZKH0018  |                      |                       |                       |                           | 169                       | 1,48                | 141                    | 267                   | M         | 1                    | I                   | 141                    | Y                  | Y            | 0                                | N                 | Y         | N                     | N                         | 210                        | 252                        | M                    | N                             | N                            | N                      | N                              | N                      | N         | N                 | N |
| TZKH0045  | No                   |                       | 142                   | 51                        | 117                       | 1,29                | 146                    | 299                   | M         | 1                    | A2                  | 184                    | Y                  | Y            | 441                              | N                 | Y         | N                     | Y                         | 146                        | 212                        | M                    | N                             | N                            | N                      | N                              | N                      | N         | N                 | N |
| TZKH0053  | L                    | 199                   |                       |                           | 89                        | -0,49               | 135                    | 272                   | PS        | 1                    | I                   | 135                    | Y                  | Y            | 9384                             | N                 | Y         | N                     | N                         | 183                        | 216                        | F                    | Y                             | N                            | N                      | N                              | N                      | N         | N                 | N |
| TZKH0054  |                      | 196                   |                       |                           |                           |                     | 134                    | 281                   | M         | 1                    | I                   | 134                    | Y                  | Y            | 0                                | N                 | Y         | Y                     | Y                         | 133                        | 189                        |                      | N                             | N                            | N                      | N                              | N                      | N         | N                 | N |
| TZKH0055  | No                   | 157                   |                       |                           | 103                       | 0,36                | 135                    | 282                   | PS        | 1                    | I                   | 135                    | Y                  | N            | 143                              | N                 | Y         | N                     | N                         | 195                        | 224                        | M                    | N                             | N                            | N                      | N                              | N                      | N         | N                 | N |
| TZKH0074  | Im                   |                       |                       | 56                        |                           | -1,24               | 101                    | 293                   | PS        | 1                    | A2                  | 182                    | Y                  | N            | 486                              | N                 | N         | N                     | N                         | 182                        | 213                        | F                    | N                             | N                            | N                      | N                              | N                      | N         | N                 | N |
| TZKH0076  | P                    |                       | 114                   | 1,2                       | 67                        | -1,91               | 127                    | 284                   | PS        | 2                    | I/I-A2              | 127/134                | Y/Y                | Y            | 5773/13244                       | N/N               | N/Y       | N                     | N                         | 210                        | 253                        | M                    | Y                             | N                            | N                      | N                              | N                      | N         | N                 | N |
| TZKH0090  |                      | 138                   |                       |                           | 86                        |                     | 152                    | 286                   | M         | 2                    | A2/D                | 190/286                | N/N                | Y            | 0/0                              | N/N               | Y/Y       | N                     | Y                         | 152                        | 217                        | M                    | N                             | N                            | N                      | N                              | N                      | N         | Y                 | N |
| TZKH0093  |                      |                       |                       |                           |                           |                     | 127                    | 259                   | PS        | 1                    | D                   | 259                    | Y                  | Y            | 0                                | N                 | Y         | N                     | Y                         | 127                        | 189                        | F                    | N                             | N                            | N                      | N                              | N                      | N         | N                 | N |
| TZKH0109  | No                   | 166                   | 112                   | 99                        | 134                       | 0,68                | 112                    | 285                   | M         | 1                    | A3-A4               | 245                    | Y                  | Y            | 45760                            | N                 | Y         | N                     | Y                         | 182                        | 213                        | F                    | N                             | N                            | N                      | N                              | N                      | N         | N                 | N |
| TZKH0111  |                      | 232                   | 128                   |                           |                           |                     | 122                    | 285                   | PS        | 2                    | I-A2/A2             | 149/182                | N/N                | Y/Y          | 0/0                              | N/N               | Y/Y       | N                     | N                         | 211                        | 253                        | F                    | Y                             | Y                            | N                      | N                              | N                      | N         | N                 | N |
| TZKH0157  | No                   | 164                   | 105                   | 82                        | 114                       | -0,88               | 86                     | 275                   | M         | 1                    | D                   | 275                    | Y                  | Y            | 4163                             | N                 | Y         | N                     | Y                         | 142                        | 184                        | M                    | N                             | N                            | N                      | N                              | N                      | Y         | N                 | N |
| TZKH0163  | P                    | 138                   |                       |                           | 49                        | -3,27               | 141                    | 266                   | PS        | 3                    | I/A3-A4/D           | 141/242/266            | Y/Y/N              | Y/Y/Y        | 1107/22468/0                     | N/N/N             | Y/Y/Y     | N                     | N                         | 141                        | 185                        | M                    | Y                             | N                            | N                      | N                              | N                      | N         | N                 | N |
| TZKH0183  | Im                   | 125                   | 116                   | 117                       | 140                       | -0,16               | 95                     | 272                   | M         | 1                    | I                   | 95                     | Y                  | Y            | 40                               | N                 | Y         | N                     | N                         | A                          |                            | M                    | Y                             | Y                            | N                      | N                              | N                      | N         | N                 | N |
| TZKH0188  | P                    | 141                   | 106                   | 32                        | 92                        | -1,03               | 110                    | 272                   | PS        | 1                    | A4                  | 257                    | Y                  | Y            | 2176                             | N                 | Y         | N                     | Y                         | 140                        | 186                        | M                    | N                             | N                            | N                      | N                              | N                      | N         | N                 | N |
| TZKH0195  | Im                   | 111                   | 129                   | 75                        | 131                       | 0,40                | 140                    | 287                   | PS        | 1                    | I                   | 140                    | Y                  | N            | 244                              | N                 | N         | N                     | N                         | 140                        | 191                        | M                    | Y                             | Y                            | N                      | N                              | Y                      | N         | N                 | N |
| TZKH0270  | Im                   | 116                   | 169                   | 48                        | 131                       |                     | 126                    | 302                   | PS        | 1                    | I- A2               | 140                    | Y                  | Y            | 2565                             | N                 | Y         | N                     | N                         | 185                        | 213                        | M                    | N                             | N                            | N                      | N                              | N                      | N         | N                 | N |
| TZKH0313  |                      | 174                   | 137                   |                           |                           |                     | 106                    | 269                   | M         | 1                    | D                   | 269                    | N                  | Y            | 0                                | N                 | Y         | N                     | Y                         | 140                        | 210                        | F                    | N                             | N                            | N                      | N                              | N                      | N         | N                 | N |
| TZKH0317  | Im                   | 182                   | 112                   | 9,8                       | 69                        | -1,78               | 117                    | 292                   | PS        | 1                    | A4                  | 255                    | Y                  | Y            | 6760                             | N                 | Y         | N                     | Y                         | 140                        | 210                        | F                    | N                             | N                            | N                      | N                              | N                      | N         | N                 | N |
| TZKH0351  | P                    | 184                   | 158                   | 13                        | 108                       | -0,47               | 140                    | 278                   | M         | 1                    | A3-A4               | 244                    | Y                  | Y            | 1278                             | N                 | Y         | N                     | Y                         | 140                        | 173                        | M                    | N                             | N                            | N                      | N                              | N                      | N         | N                 | N |
| TZKH0382  | No                   | 136                   | 147                   | 89                        | 155                       | 0,82                | 141                    | 280                   | PS        | 1                    | D                   | 280                    | Y                  | Y            | 5040                             | Y                 | Y         | N                     | Y                         | 141                        | 211                        | M                    | N                             | N                            | N                      | N                              | N                      | N         | N                 | N |
| TZKH0388  | P                    | 141                   | 130                   | 39                        | 110                       | -1,00               | 125                    | 272                   | PS        | 1                    | A3                  | 210                    | Y                  | Y            | 2005                             | N                 | Y         | N                     | Y                         | 139                        | 252                        | M                    | Y                             | N                            | N                      | N                              | N                      | N         | N                 | N |

| ID number | Fetal growth pattern | ANV2-ANV3 (g/week*kg) | ANV3-ANV4 (g/week*kg) | ANV4-Delivery (g/week*kg) | ANV3-Delivery (g/week*kg) | Z-score at delivery | GA at inclusion (days) | GA at Delivery (days) | Gravidity | Number of infections | Timing of infection | GA at infection (Days) | Slide/PCR positive | RDT positive | Parasitemia at infection (IE/ul) | Febrile infection | Treatment | IPTp before inclusion | IPTp before 1st infection | GA (days) at 1st IPTp dose | GA (days) at 2nd IPTp dose | Sex of fetus/newborn | Ever severe anemia (Hb<8g/dl) | Persistent anemia (Hb<8g/dl) | MUAC<23cm at inclusion | Pregnancy-induced hypertension | Maternal HIV infection | Stillborn | Maternal diabetes |
|-----------|----------------------|-----------------------|-----------------------|---------------------------|---------------------------|---------------------|------------------------|-----------------------|-----------|----------------------|---------------------|------------------------|--------------------|--------------|----------------------------------|-------------------|-----------|-----------------------|---------------------------|----------------------------|----------------------------|----------------------|-------------------------------|------------------------------|------------------------|--------------------------------|------------------------|-----------|-------------------|
| TZKH0392  |                      | 149                   | 112                   |                           |                           |                     | 94                     | 278                   | PS        | 1                    | A2                  | 187                    | Y                  | Y            | 0                                | N                 | Y         | N                     | Y                         | 141                        | 218                        | M                    | N                             | N                            | N                      | N                              | N                      | N         | N                 |
| TZKH0404  |                      | 176                   | 111                   |                           |                           |                     | 121                    | 272                   | M         | 1                    | D                   | 272                    | N                  | Y            | 0                                | N                 | Y         | N                     | Y                         | 144                        | 210                        | M                    | Y                             | N                            | N                      | N                              | N                      | N         | N                 |
| TZKH0406  |                      | 152                   | 126                   | 118                       | 154                       |                     | 137                    | 276                   | M         | 1                    | D                   | 276                    | N                  | Y            | 0                                | N                 | Y         | N                     | Y                         | 137                        | 212                        | F                    | N                             | N                            | N                      | N                              | N                      | Y         | N                 |
| TZKH0415  | No                   | 187                   | 124                   | 16                        | 75                        | -1,41               | 138                    | 294                   | M         | 1                    | I                   | 138                    | N                  | Y            | 0                                | N                 | Y         | N                     | N                         | 189                        | 252                        | F                    | Y                             | N                            | Y                      | N                              | Y                      | N         | N                 |
| TZKH0419  |                      | 155                   | 112                   |                           |                           |                     | 157                    | 265                   | PS        | 1                    | I                   | 157                    | Y                  | N            | 206                              | N                 | N         | N                     | N                         | 157                        | 211                        | F                    | N                             | N                            | N                      | N                              | N                      | N         | N                 |
| TZKH0425  |                      | 153                   | 114                   |                           |                           |                     | 121                    | 267                   | PS        | 2                    | A2/A2-A3            | 183/211                | N/N                | Y/Y          | 0/0                              | N/N               | Y/N       | N                     | Y                         | 139                        | 211                        | F                    | Y                             | N                            | N                      | N                              |                        | N         | N                 |
| TZKH0436  | L                    | 181                   | 116                   | -19                       | 51                        | -3,43               | 137                    | 287                   | PS        | 1                    | A3                  | 212                    | Y                  | Y            | 23588                            | N                 | Y         | N                     | Y                         | 137                        | 254                        | M                    | N                             | N                            | Y                      | N                              | N                      | N         | N                 |
| TZKH0437  | L                    | 203                   | 92                    | 30                        | 72                        | -1,31               | 86                     | 284                   | PS        | 2                    | I/D                 | 86/284                 | Y/N                | Y/Y          | 0/0                              | N/N               | Y/Y       | N                     | N                         | 140                        | 210                        | M                    | N                             | N                            | N                      | N                              | N                      | N         | N                 |
| TZKH0438  | No                   | 156                   | 140                   | 103                       | 161                       | 1,48                | 58                     | 282                   | M         | 1                    | A2                  | 182                    | Y                  | Y            | 817                              | N                 | Y         | N                     | N                         | A                          |                            | M                    | N                             | N                            | N                      | N                              |                        | N         | N                 |
| TZKH0444  | No                   | 168                   | 114                   | 77                        | 121                       | -0,06               | 126                    | 280                   | PS        | 1                    | D                   | 280                    | N                  | Y            | 0                                | N                 | Y         | N                     | Y                         | 140                        | 210                        | F                    | N                             | N                            | N                      | N                              | N                      | N         | N                 |
| TZKH0461  | No                   | 185                   | 119                   | 40                        | 97                        | -1,21               | 109                    | 289                   | PS        | 2                    | A2-A3/A4            | 199/254                | Y/Y                | Y/Y          | 390749/247                       | N/N               | Y/Y       | N                     | Y                         | 140                        | 210                        | M                    | N                             | N                            | N                      | N                              | N                      | N         | N                 |
| TZKH0517  |                      | 184                   | 113                   |                           |                           |                     | 106                    | 298                   | PS        | 2                    | I/- A2              | 106/113                | Y/Y                | Y/Y          | 1012/665                         | N/N               | N/Y       | N                     | N                         | 151                        | 211                        | M                    | N                             | N                            | Y                      | N                              | N                      | N         | N                 |
| TZKH0524  | No                   | 170                   | 126                   | 60                        | 120                       | 0,28                | 167                    | 280                   | M         | 1                    | A3                  | 212                    | Y                  | Y            | 0                                | N                 | Y         | N                     | Y                         | 167                        | 212                        | M                    | N                             | N                            | N                      | N                              | N                      | N         | N                 |
| TZKH0584  | Im                   | 110                   |                       |                           | 122                       | -1,23               | 113                    | 270                   | PS        | 1                    | A3                  | 208                    | Y                  | Y            | 582                              | N                 | Y         | N                     | Y                         | 140                        | 210                        | M                    | N                             | N                            | N                      | N                              | N                      | N         | N                 |
| TZKH0618  | L                    | 211                   | 141                   | 24                        | 103                       | -0,38               | 114                    | 281                   | M         | 1                    | I                   | 114                    | Y                  | Y            | 0                                | N                 | Y         | N                     | N                         | 142                        | 211                        | F                    | N                             | N                            | N                      | N                              | Y                      | N         | N                 |
| TZKH0638  | No                   |                       | 113                   | 41                        | 90                        | -0,69               | 149                    | 278                   | PS        | 1                    | I                   | 149                    | Y                  | Y            | 698                              | N                 | Y         | N                     | N                         | 224                        | 254                        | M                    | N                             | N                            | N                      | N                              | N                      | N         | N                 |
| TZKH0644  | Im                   | 133                   | 90                    | 55                        | 87                        | -1,45               | 156                    | 280                   | PS        | 1                    | I                   | 156                    | Y                  | Y            | 0                                | N                 | Y         | N                     | N                         | 184                        | 210                        | F                    | N                             | N                            | N                      | N                              | N                      | N         | N                 |
| TZKH0648  | No                   | 148                   | 135                   | 58                        | 115                       | 0,86                | 122                    | 279                   | M         | 1                    | D                   | 279                    | N                  | Y            | 0                                | N                 | Y         | N                     | Y                         | 141                        | 225                        | F                    | N                             | N                            | N                      | N                              | N                      | N         | N                 |
| TZKH0658  | No                   | 152                   |                       |                           | 146                       | 0,60                | 141                    | 282                   | PS        | 1                    | I                   | 141                    | Y                  | Y            | 0                                | N                 | Y         | N                     | N                         | 184                        | 211                        | M                    | Y                             | N                            | Y                      | N                              |                        | N         | N                 |
| TZKH0678  | No                   | 168                   | 132                   | 83                        | 139                       | 0,78                | 121                    | 278                   | PS        | 1                    | I                   | 121                    | Y                  | Y            | 0                                | N                 | Y         | N                     | N                         | 140                        | 210                        | M                    | N                             | N                            | N                      | N                              | N                      | N         | N                 |
| TZKH0679  | L                    | 175                   | 109                   | 120                       | 136                       | -0,79               | 128                    | 271                   | PS        | 1                    | I                   | 128                    | Y                  | Y            | 0                                | N                 | Y         | N                     | N                         | 141                        | 212                        | M                    | N                             | N                            | N                      | N                              | N                      | N         | N                 |
| TZKH0709  |                      | 159                   | 104                   |                           |                           |                     | 114                    |                       | PS        | 1                    | I                   | 114                    | Y                  | Y            | 1613                             | N                 | Y         | N                     | N                         | 143                        | 218                        | M                    | N                             | N                            | N                      | N                              | N                      | N         | N                 |
| TZKH0740  | L                    | 173                   | 102                   | 21                        | 69                        | -0,27               | 153                    | 277                   | PS        | 1                    | I                   | 153                    | Y                  | Y            | 1024                             | N                 | Y         | N                     | N                         | 188                        | 222                        | F                    | N                             | N                            | N                      | N                              | N                      | N         | N                 |
| TZKH0775  | L                    | 214                   |                       |                           | 86                        | -0,41               | 124                    | 246                   | PS        | 1                    | I                   | 124                    | Y                  | Y            | 457                              | N                 | Y         | N                     | N                         | 140                        | 213                        | F                    | Y                             | N                            | N                      | N                              | N                      | N         | N                 |
| TZKH0800  |                      | 149                   | 123                   |                           |                           |                     | 115                    | 276                   | M         | 1                    | I                   | 115                    | Y                  | Y            | 0                                | N                 | Y         | N                     | N                         | 140                        | 210                        | M                    | N                             | N                            | N                      | Y                              | Y                      | N         | N                 |
| TZKH0811  | Im                   | 140                   | 125                   |                           | 139                       | 0,53                | 157                    | 258                   | PS        | 1                    | I                   | 157                    | Y                  | Y            | 12494                            | N                 | Y         | N                     | N                         | 189                        | 256                        | M                    | Y                             | N                            | N                      | N                              |                        | N         | N                 |
| TZKH0825  | Im                   | 138                   | 130                   | 166                       | 182                       | 1,93                | 143                    | 278                   | PS        | 1                    | I                   | 143                    | N                  | Y            | 0                                | N                 | Y         | N                     | N                         | 153                        | 212                        | F                    | N                             | N                            | N                      | N                              | N                      | N         | N                 |
| TZKH0838  | P                    | 119                   | 114                   | 23                        | 90                        | -1,95               | 139                    | 278                   | PS        | 1                    | I                   | 139                    | Y                  | Y            | 0                                | N                 | Y         | N                     | N                         | 182                        | 210                        | M                    | N                             | N                            | N                      | N                              | N                      | N         | N                 |

| ID number | Fetal growth pattern | ANV2-ANV3 (g/week*kg) | ANV3-ANV4 (g/week*kg) | ANV4-Delivery (g/week*kg) | ANV3-Delivery (g/week*kg) | Z-score at delivery | GA at inclusion (days) | GA at Delivery (days) | Gravidity | Number of infections | Timing of infection | GA at infection (Days) | Slide/PCR positive | RDT positive | Parasitemia at infection (IE/ul) | Febrile infection | Treatment | IPTp before inclusion | IPTp before 1st infection | GA (days) at 1st IPTp dose | GA (days) at 2nd IPTp dose | Sex of fetus/newborn | Ever severe anemia (Hb<8g/dl) | Persistent anemia (Hb<8g/dl) | MUAC<23cm at inclusion | Pregnancy-induced hypertension | Maternal HIV infection | Stillborn | Maternal diabetes |
|-----------|----------------------|-----------------------|-----------------------|---------------------------|---------------------------|---------------------|------------------------|-----------------------|-----------|----------------------|---------------------|------------------------|--------------------|--------------|----------------------------------|-------------------|-----------|-----------------------|---------------------------|----------------------------|----------------------------|----------------------|-------------------------------|------------------------------|------------------------|--------------------------------|------------------------|-----------|-------------------|
| TZKH0839  | No                   | 180                   | 124                   | 148                       | 161                       | 0,21                | 126                    | 267                   | PS        | 2                    | A3-A4/A4            | 232/251                | Y/N                | Y/Y          | 91667/0                          | Y/N               | Y/N       | N                     | Y                         | 140                        | 211                        | F                    | N                             | N                            | N                      | N                              | N                      | N         | N                 |
| TZKH0871  | L                    | 180                   | 112                   | 37                        | 88                        | -0,23               | 119                    | 283                   | PS        | 1                    | I                   | 119                    | Y                  | Y            | 1509                             | N                 | Y         | N                     | N                         | 141                        | 215                        | F                    | Y                             | N                            | Y                      | N                              | N                      | N         | N                 |
| TZKH0873  | L                    | 202                   | 156                   | 33                        | 113                       | 0,74                | 143                    | 290                   | PS        | 1                    | I                   | 143                    | Y                  | Y            | 2570                             | N                 | N         | N                     | N                         | 182                        | On TS                      | M                    | N                             | N                            | N                      | N                              | Y                      | N         | N                 |
| TZKH0878  | Im                   | 189                   | 87                    | 43                        | 74                        | -1,57               | 126                    | 290                   | PS        | 1                    | A4                  | 256                    | N                  | Y            | 0                                | N                 | N         | N                     | Y                         | 141                        | 222                        | M                    | N                             | N                            | Y                      | N                              | N                      | N         | N                 |
| TZKH0901  |                      | 165                   | 130                   |                           |                           |                     | 50                     | 275                   | PS        | 1                    | A3-A4               | 247                    | Y                  | Y            | 462                              | N                 | Y         | N                     | Y                         | 183                        | 212                        | F                    | N                             | N                            | N                      | N                              | N                      | N         | N                 |
| TZKH0922  | P                    | 185                   | 123                   | 16                        | 86                        | -1,36               | 101                    | 280                   | PS        | 1                    | A3                  | 210                    | N                  | Y            | 0                                | N                 | Y         | N                     | Y                         | 140                        | 210                        | M                    | N                             | N                            | N                      | N                              | N                      | N         | N                 |
| TZKH0985  | Im                   | 185                   | 105                   | 43                        | 90                        | -0,44               | 112                    | 284                   | PS        | 1                    | A3                  | 211                    | Y                  | Y            | 101208                           | Y                 | Y         | N                     | Y                         | 142                        | 253                        | F                    | N                             | N                            | N                      | N                              | N                      | N         | N                 |
| TZKH0999  | L                    | 174                   | 125                   | 20                        | 83                        | -0,49               | 137                    | 288                   | PS        | 1                    | I- A2               | 174                    | Y                  | Y            | 11091                            | Y                 | Y         | N                     | Y                         | 137                        | 210                        | F                    | N                             | N                            | N                      | N                              | N                      | N         | N                 |
| TZKH1000  |                      | 200                   | 133                   |                           |                           |                     | 112                    | 277                   | PS        | 2                    | I/A2                | 112/182                | Y/N                | Y/Y          | 433/0                            | N/N               | Y/Y       | N                     | N                         | 140                        | 210                        | M                    | N                             | N                            | N                      | N                              | N                      | N         | N                 |
| TZKH1019  | No                   | 132                   | 119                   | 76                        | 122                       | -1,03               | 140                    | 275                   | M         | 1                    | D                   | 275                    | N                  | Y            | 0                                | N                 | Y         | N                     | Y                         | 140                        | 212                        | F                    | N                             | N                            | N                      | N                              | N                      | N         | N                 |
| TZKH1046  | P                    | 144                   | 163                   | 32                        | 116                       | 0,60                | 61                     | 290                   | M         | 1                    | A2-A3               | 185                    | N                  | Y            | 0                                | N                 | Y         | N                     | Y                         | 183                        | 211                        | F                    | N                             | N                            | N                      | N                              | N                      | N         | N                 |
| TZKH1055  | Im                   | 145                   | 125                   | 15                        | 84                        | -1,28               | 119                    | 285                   | PS        | 1                    | I- A2               | 170                    | Y                  | Y            | 3206                             | N                 | N         | N                     | Y                         | 143                        | 211                        | F                    | Y                             | N                            | Y                      | N                              | N                      | N         | N                 |
| TZKH1057  | No                   | 137                   | 174                   | 49                        | 146                       | 0,25                | 152                    | 279                   | M         | 1                    | D                   | 279                    | N                  | Y            | 0                                | N                 | Y         | N                     | Y                         | 152                        | 210                        | M                    | N                             | N                            | N                      | N                              | N                      | N         | N                 |
| TZKH1063  | No                   | 168                   | 150                   |                           | 138                       | 0,54                | 141                    | 272                   | PS        | 1                    | I                   | 141                    | Y                  | N            | 86                               | N                 | N         | N                     | N                         | 141                        | 212                        | F                    | N                             | N                            | N                      | N                              | N                      | N         | N                 |
| TZKH1065  |                      | 196                   | 113                   |                           |                           |                     | 144                    | 280                   | M         | 1                    | D                   | 280                    | Y                  | Y            | 0                                | N                 | Y         | N                     | Y                         | 144                        | 213                        | M                    | Y                             | N                            | N                      | N                              | N                      | N         | N                 |
| TZKH1074  |                      | 158                   | 122                   |                           |                           |                     | 153                    | 278                   | PS        | 1                    | A4                  | 252                    | Y                  | Y            | 37471                            | Y                 | Y         | Y                     | Y                         | < Incl.                    | 211                        | F                    | N                             | N                            | N                      | N                              | N                      | N         | N                 |
| TZKH1108  | No                   | 200                   | 130                   | 70                        | 127                       | -0,50               | 78                     | 278                   | PS        | 1                    | I                   | 78                     | N                  | Y            | 0                                | Y                 | Y         | N                     | N                         | 142                        | 212                        | M                    | N                             | N                            | N                      | N                              | N                      | N         | N                 |
| TZKH1118  | No                   | 153                   | 149                   | 54                        | 139                       | -0,13               | 48                     | 274                   | PS        | 1                    | A2-A3               | 193                    | Y                  | Y            | 2262                             | N                 | Y         | N                     | Y                         | 140                        | 210                        | F                    | N                             | N                            | N                      | N                              | N                      | N         | N                 |
| TZKH1126  | Im                   | 152                   | 154                   | 105                       | 168                       | 2,15                | 115                    | 269                   | M         | 1                    | A2                  | 185                    | Y                  | Y            | 35475                            | N                 | Y         | N                     | Y                         | 140                        | 210                        | M                    | N                             | N                            | N                      | N                              | N                      | N         | N                 |
| TZKH1150  |                      |                       |                       |                           |                           |                     | 149                    | 282                   | M         | 1                    | I                   | 149                    | Y                  | Y            | 0                                | N                 | Y         | N                     | N                         | N                          | N                          | F                    | N                             | N                            | N                      | N                              | N                      | N         | N                 |
| TZKH1167  | No                   | 192                   | 128                   | 95                        | 145                       | 0,70                | 78                     | 284                   | M         | 2                    | A2-A3/A3            | 190/210                | Y/Y                | Y/Y          | 4532/4532                        | N/N               | Y/Y       | N                     | Y                         | 140                        | 210                        | F                    | N                             | N                            | N                      | N                              | N                      | N         | N                 |

Abbreviations: A/ANV = antenatal visits, A = allergic to SP and did not received IPTp, D = delivery, GA = gestational age, Hb = hemoglobin, HIV = human immunodeficiency virus, I = inclusion, Im = immediate, IE = infected erythrocytes, IPTp = Intermittent preventive treatment in pregnancy, <Incl. = recieved 1st dose before inclusion in the study, M = multigravidae, MUAC = mid-upper arm circumference, N = no, No = normal, PS = primi-and secundigravidae, Y = yes.
